1 **Transcriptional Regulation and Mechanism of SigN (ZpdN), a pBS32 encoded**  
2 **Sigma Factor**

3

4

5 Aisha T. Burton<sup>1</sup>, Aaron DeLoughery<sup>2</sup>, Gene-Wei Li<sup>2</sup>, and Daniel B. Kearns<sup>1\*</sup>

6 1Department of Biology, Indiana University, Bloomington, IN 47408

7 2Department of Biology, Massachusetts Institute of Technology, Cambridge, MA 02142

8 \*corresponding author

9

10

11

12

13

14

15

16

17

18

19

20

21 Running title: SigN is a plasmid-encoded sigma factor

22

23 Keywords: sigma factor, RNAP, plasmid, LexA, cell death

24 **ABSTRACT**

25 Laboratory strains of *Bacillus subtilis* encodes as many as 16 alternative sigma factors,  
26 each dedicated to expressing a unique regulon such as those involved in stress  
27 resistance, sporulation, and motility. The ancestral strain of *B. subtilis* also encodes an  
28 additional sigma factor homolog, ZpdN, not found in lab strains due to it being encoded  
29 on the large, low copy number plasmid pBS32 that was lost during domestication. DNA  
30 damage triggers pBS32 hyper-replication and cell death in a manner that depends on  
31 ZpdN but how ZpdN mediates these effects was unknown. Here we show that ZpdN is a  
32 bona fide sigma factor that can direct RNA polymerase to transcribe ZpdN-dependent  
33 genes and we rename ZpdN to SigN accordingly. Rend-seq analysis was used to  
34 determine the SigN regulon on pBS32, and the 5' ends of transcripts were used to  
35 predict the SigN consensus sequence. Finally, we characterize the regulation of SigN  
36 itself, and show that it is transcribed by at least three promoters:  $P_{sigN1}$ , a strong SigA-  
37 dependent LexA-repressed promoter,  $P_{sigN2}$ , a weak SigA-dependent constitutive  
38 promoter, and  $P_{sigN3}$ , a SigN-dependent promoter. Thus, in response to DNA damage  
39 LexA is derepressed, SigN is expressed and then experiences positive feedback. How  
40 cells die in a pBS32-dependent manner remains unknown, but we predict that death is  
41 the product of expressing one or more genes in the SigN regulon.

42

43

44 **IMPORTANCE**

45 Sigma factors are utilized by bacteria to control and regulate gene expression. Extra  
46 cytoplasmic function sigma factors are activated during times of stress to ensure the  
47 survival of the bacterium. Here, we report the presence of a sigma factor that is  
48 encoded on a plasmid that leads to cellular death after DNA damage.

49

## 50 INTRODUCTION

51 Propagation and cultivation of bacteria in the laboratory has been shown to  
52 select for enhanced axenic growth and genetic tractability in a process called  
53 domestication. The model genetic bacterium *Bacillus subtilis* is an example of a  
54 commonly used domesticated bacterium as the laboratory strains differ substantially  
55 from the ancestor from which they were derived. For example, lab strains are defective  
56 for biofilm formation, reduced for motility, are auxotrophic for one or more amino acids,  
57 and are deficient in the ability to synthesize multiple antibiotics, a potent surfactant, and  
58 viscous slime layer production (1–5). While many traits were lost during the  
59 domestication of laboratory strains, one important trait was gained: high frequency  
60 uptake of extracellular DNA in a process called natural genetic competence. Later it was  
61 shown that increased genetic competence was also due to genetic loss, in this case due  
62 to the loss of the endogenous plasmid pBS32 (6, 7).

63 pBS32, is a large, 84 kb, low copy number plasmid that has a separate  
64 replication initiation protein and a high-fidelity plasmid partitioning system (6, 8–10).  
65 Moreover, pBS32 been shown to encode an inhibitor of competence for DNA uptake  
66 (ComI) (7) and an inhibitor of biofilm formation (RapP) that directly regulate cell  
67 physiology (11–13). In addition, approximately one third of the pBS32 sequence  
68 encodes a cryptic prophage like element, cell death is triggered in a pBS32-dependent  
69 manner following treatment with the DNA damaging agent, mitomycin C (MMC), and  
70 MMC often induces prophage conversion (7, 14–17). pBS32-dependent cell death  
71 upon mitomycin C treatment requires a plasmid-encoded sigma factor homolog, ZpdN  
72 and artificial ZpdN induction was shown to be sufficient to trigger cell death (17). How

73 ZpdN is activated by the presence of DNA damage and the mechanism by which ZpdN  
74 promoted cell death was unknown.

75 Here we show that ZpdN functions as a *bona fide* sigma factor which directs  
76 RNA polymerase to transcribe a large regulon of genes encoded on pBS32. Based on  
77 our findings we rename ZpdN to SigN and propose a SigN-dependent consensus  
78 sequence for transcriptional activation. We show that SigN induction triggers immediate  
79 loss of cell viability, even as cells continue to grow and the cell culture increases in  
80 optical density. We characterize the *sigN* promoter region and find multiple promoters  
81 that activate its expression including a DNA damage-responsive LexA-repressed  
82 promoter and a separate promoter that governs autoactivation. Finally, the SigN regulon  
83 does not appear to include the pBS32 putative prophage region and thus cell death may  
84 be prophage independent. The gene or genes responsible for pBS32-mediated cell  
85 death remain unknown but we infer that they must reside within the plasmid expressed  
86 by SigN and RNA polymerase.

87

## 88 **MATERIALS AND METHODS**

89 **Strains and growth conditions:** *B. subtilis* strains were grown in lysogeny broth (LB)  
90 (10 g tryptone, 5 g yeast extract, 5 g NaCl per L) broth or on LB plates fortified with  
91 1.5% Bacto agar at 37°C. When appropriate, antibiotics were used at the following  
92 concentrations: 5 µg/ml kanamycin, 100 µg/ml spectinomycin, 5 µg/ml chloramphenicol,  
93 and 10 µg/ml tetracycline, 1 µg/ml erythromycin with 25 µg/ml lincomycin (*mls*).  
94 Mitomycin C (MMC, DOT Scientific) was added to the medium at the indicated

95 concentration when appropriate. Isopropyl  $\beta$ -D-thiogalactopyranoside (IPTG, Sigma)  
96 was added to the medium as needed at the indicated concentration.

97

98 **Strain Construction.** All constructs were first introduced into the domesticated strain  
99 PY79 or into the pBS32 cured strain (DS2569) by natural competence and then  
100 transferred into the 3610-background using SPP1-mediated generalized phage  
101 transduction (18). Strains were also produced by transforming directly into the  
102 competent derivatives of 3610: DK607 ( $\Delta comI$ ) or DK1042 (Q. to L change at position  
103 12 encoded by *comI*). All strains used in this study are listed in Table 1. All plasmids  
104 used in this study are listed in Supplemental Table S1. All primers used in this study  
105 are listed in Supplemental Table S2.

106

107 LacZ Reporter Constructs: To generate the  $\beta$ -galactosidase (*lacZ*) reporter construct  
108 *aprE::P<sub>sigN</sub>-lacZ cat*, PCR was utilized to amplify the promoter region of *sigN* using the  
109 primer set 4500/4528 from *B. subtilis* 3610 chromosomal DNA and primer set  
110 4438/4501 was used to amplify the *aprE* up region and *cat<sup>R</sup>* from DK2862 while primer  
111 set 4527/4441 was used to amplify the *aprE* down region and *lacZ* from DK2862. These  
112 DNA fragments were ligated together in a Gibson ITA assembly reaction (see below) for  
113 1 hr at 60°C. Cementing PCR was performed using primer set 4438/441 and cleaned up  
114 using a QIAquick PCR Purification Kit (Qiagen) and transformed into DK1042.

115 To generate the  $P_{sigN}^{UP}$  and  $P_{sigN}^{DN}$   $\beta$ -galactosidase reporter constructs at *thrC*,  
116 the promoter region of *sigN* was amplified via PCR with the primer set 6089/6090 for  
117  $P_{sigN}^{UP}$  and 6087/6088 for  $P_{sigN}^{DN}$  from *B. subtilis* 3610 chromosomal DNA. Each PCR

118 product was digested with *EcoRI* and *BamHI* and cloned independently into the *EcoRI*  
119 and *BamHI* sites of plasmid pDG1663, which carries an erythromycin-resistance  
120 marker and a polylinker upstream of the *lacZ* gene between the two arms of the *thrC*  
121 gene to create pATB9 and pATB10 resepctively. These plasmids were transformed into  
122 DK1042.

123 To generate the  $P_{sigN}^{UP}$  and  $P_{sigN}^{DN}$   $\beta$ -galactosidase reporter constructs at *aprE*,  
124 the first half of the promoter was PCR amplified using primers 4500 and 4707 from *B.*  
125 *subtilis* 3610 chromosomal DNA. The second half of the promoter was amplified using  
126 primer set 4708/4528 from *B. subtilis* 3610 chromosomal DNA. For  $P_{sigN}^{UP}$ , the flanking  
127 regions of AprE were amplified as described above. For  $P_{sigN}^{DN}$ , the flanking regions  
128 were amplified with the following primer sets: *aprE* up region and *cat*<sup>R</sup> (4438/4498) *aprE*  
129 down region and *lacZ* (4527/4441) from DK2862. Each promoter region was fused to  
130 the respective flanking arms of the *aprE* region using Gibson ITA assembly as  
131 described above. Fused and amplified fragments were transformed into DK1042.

132 To generate the  $P_{zpcJ}$ ,  $P_{zpcX}$ , and  $P_{zpdG}$   $\beta$ -galactosidase reporter constructs,  
133 primer sets were used in the following order to amplify each promoter region: 6276/6277  
134 ( $P_{zpcJ}$ ), 6278/6279 ( $P_{zpcX}$ ), and 6280/6281 ( $P_{zpdG}$ ). Each promoter region was digested  
135 with *EcoRI* and *BamHI* and subsequently cloned independently into the *EcoRI* and  
136 *BamHI* sites of plasmid pDG1663, which carries an erythromycin-resistance marker  
137 and a polylinker upstream of the *lacZ* gene between the two arms of the *thrC* gene to  
138 create pATB12, pATB13, and pATB14 resepctively. These plasmids were transformed  
139 into DK1042.

140

141 *lexA::mIs*. The *lexA::mIs* insertion deletion allele was generated using a modified  
142 “Gibson” isothermal assembly protocol (19). Briefly, the region upstream of *lexA* was  
143 PCR amplified using the primer pair 5661/5662 and the region downstream of *lexA* was  
144 PCR amplified using the primer pair 5663/5664. To amplify the *erm* resistance gene,  
145 pAH52 plasmid DNA was used in a PCR reaction with the universal primers  
146 3250/23251. Fragments were added in equimolar amounts to the Gibson ITA assembly  
147 reaction and it was performed as explained above. The completed reaction was then  
148 PCR amplified using primers 5661/5664 to amplify the assembled product. The product  
149 was transformed into DK1042.

150

151 Isothermal assembly reaction buffer (5X): 500 mM Tris-HCL (pH 7.5), 50 mM MgCl<sub>2</sub>, 50  
152 mM DTT (Bio-Rad), 31.25 mM PEG-8000 (Fisher Scientific), 5.02 mM NAD (Sigma  
153 Aldrich), and 1 mM of each dNTP (New England BioLabs) was aliquoted and stored at -  
154 80° C. An assembly master mixture was made by combining prepared 5X isothermal  
155 assembly reaction buffer (131 mM Tris-HCl, 13.1 mM MgCl<sub>2</sub>, 13.1 mM DTT, 8.21 mM  
156 PEG-8000, 1.32 mM NAD, and 0.26 mM each dNTP) with Phusion DNA polymerase  
157 (New England BioLabs) (0.033 units/μL), T5 exonuclease diluted 1:5 with 5X reaction  
158 buffer (New England BioLabs) (0.01 units/μL), Taq DNA ligase (New England BioLabs)  
159 (5328 units/μL), and additional dNTPs (267 μM). The master mix was aliquoted as 15 μl  
160 and stored at -80° C.

161

162 **SPP1 Phage Transduction.** To a 0.2 ml dense culture grown in TY broth (LB  
163 supplemented with 10 mM MgSO<sub>4</sub> and 100 μM MnSO<sub>4</sub> after autoclaving), serial



164 dilutions of SPP1 phage stock were added. This mixture was allowed to statically  
165 incubate at 37°C for 15 minutes. A 3 ml volume of TYSA (molten TY with 0.5% agar)  
166 was added to each mixture and poured on top of fresh TY plates. The plates were  
167 incubated at 37 °C overnight. Plates on which plaques formed had the top agar  
168 harvested by scraping into a 50 ml conical tube. To release the phage, the tube was  
169 vortexed for 20 seconds and centrifuged at 5,000 x g for 10 minutes. The supernatant  
170 was passed through a 0.45 µm syringe filter and stored at 4 °C.

171 Recipient cells were grown in 2 ml of TY broth at 37 °C until stationary phase  
172 was reached. A 5 µl volume of SPP1 donor phage stock was added to 0.9 of cells and 9  
173 ml of TY broth was added to this mixture. The transduction mixture was allowed to  
174 stand statically at room temperature for 30 minutes. After incubation, the mixture was  
175 centrifuged at 5,000 x g for 10 minutes, the supernatant was discarded, and the pellet  
176 was resuspended in the volume left. 100 – 200 µl of the cell suspension was plated on  
177 TY fortified with 1.5% agar, 10 mM sodium citrate, and the appropriate antibiotic for  
178 selection.

179

## 180 **Protein Purification.**

181 To create the SUMO-SigN fusion protein expression vector, the coding sequence  
182 of SigN was amplified from 3610 genomic DNA with primers that also introduced a *SapI*  
183 site at the 5' end and a *Bam*HI site at the 3' end. This fragment was ligated into the *SapI*  
184 and *Bam*HI sites of pTB146 to create pBM05.

185 To purify SigN, pBM05 was expressed in Rosetta Gami II cells and grown at 37  
186 °C until mid-log phase (~0.5 OD<sub>600</sub>). IPTG was added to the cells to induce protein

187 expression and cells were allowed to grow overnight at 16 °C. Cells were harvested by  
188 centrifugation, washed, and emulsified with EmulsiFlex-C3 (Avestin). Lysed cells were  
189 ultracentrifuged at 14,000 x g for 30 minutes at 4°C. The supernatant was mixed with  
190 Ni<sup>2+</sup>-NTA His•Bind resin (EMD Millipore) equilibrated with Lysis/Binding Buffer (50 mM  
191 Na<sub>2</sub>HPO<sub>4</sub>, 300 mM NaCl, 10 mM Imidazole, final pH 7.5) and allowed to incubate  
192 overnight at 4°C. The bead/lysate mixture was allowed to pack in a 1 cm separation  
193 column (Bio-Rad) and washed with Wash Buffer (50 mM Na<sub>2</sub>HPO<sub>4</sub>, 300 mM NaCl, 30  
194 mM Imidazole, final pH 7.5). His-SUMO-SigN bound to the resin and was eluted using a  
195 stepwise elution of Wash Buffer with 50 -500 mM Imidazole and 10% glycerol to a final  
196 pH 7.5. Elutions were separated by SDS-PAGE and stained with Coomassie Brilliant  
197 Blue to verify purification. Purified His-SUMO-SigN was combined with Ubiquitin Ligase  
198 (protease) and Cleavage Buffer and incubated for at room temperature for 4 hrs to  
199 cleave the SUMO tag from the SigN protein (Butt et al., 2005 (add inREF)). The  
200 cleavage reaction was combined with Ni<sup>2+</sup>-NTA His•Bind resin, incubated for 1 hour at  
201 4°C and centrifuged to pellet the resin. Supernatant was removed and dialyzed into  
202 Lysis/Binding Buffer without the Imdazole (50 mM Na<sub>2</sub>HPO<sub>4</sub>, 300 mM NaCl, 20%  
203 glycerol, final pH 7.5). Removal of the tag was confirmed by SDS-Page and staining  
204 with Coomassie Brilliant Blue.

205 To purify RNA polymerase, LB supplemented with kanamycin (5 µg/ml) was  
206 inoculated with an overnight culture of DK4203, which has the *rpoC-hisX6* construct  
207 integrated into the native site of *rpoC*. The cells were grown at 37 °C until they hit mid-  
208 log phase (~0.5 OD<sub>600</sub>) and harvested via centrifugation. The collected cells were  
209 washed with Buffer I [10 mM Tris-HCl (pH 8.0), 0.1 M KCl, 1mM β-mercaptoethanol,

210 10% (v/v) glycerol] twice, resuspended in Buffer G [10 mM Tris-HCl (pH 8.0), 20% (v/v)  
211 glycerol, 10 mM imidazole, 0.5 mg/ml lysozyme], and emulsified with EmulsiFlex-C3  
212 (Avestin). The extracts were centrifuged for 30 min at 28,000 x g twice. The supernatant  
213 was mixed with Ni<sup>2+</sup>-NTA His•Bind resin (EMD Millipore) equilibrated with Buffer G and  
214 allowed to go overnight at 4 °C. Collect the resin by centrifugation and wash with Buffer  
215 G. Buffer E [10 mM Tris-HCl (pH 8.0), 20% (v/v) glycerol, 500 mM imidazole] was used  
216 to elute the proteins associated with the resin and dialyzed in TGED buffer [10 mM Tris-  
217 HCl (pH 8.0), 1 mM EDTA, 0.3 mM DTT, 20% (v/v) glycerol].

218 To create the SUMO-LexA fusion protein expression vector, the coding sequence  
219 of LexA was amplified from 3610 genomic DNA with primers that also introduced a *SapI*  
220 site at the 5' end and a *Bam*HI site at the 3' end. This fragment was ligated into the *SapI*  
221 and *Bam*HI sites of pTB146 to create pATB11.

222 For the purification of LexA, pATB11 was expressed in Rosetta Gami II cells and  
223 grown at 37 °C until mid-log phase (~0.5 OD<sub>600</sub>). Cells were treated the same as in the  
224 protein purification procedure for SigN (above).

225

226 **SigN Antibody Purification.** One milligram of purified SigN protein was sent to  
227 Cocalico Biologicals for serial injection into a rabbit host for antibody generation. Anti-  
228 SigN serum was mixed with SigN-conjugated Affigel-10 beads and incubated overnight  
229 at 4°C. Beads were packed onto a 1 cm column (Bio-Rad) and washed with 100mM  
230 glycine (pH 2.5) to release the antibody and neutralized immediately with 2M Tris base.  
231 The antibody was verified using SDS-PAGE and stained with Coomassie Brilliant Blue

232 Purified anti-SigN antibody was dialyzed into 1X PBS with 50% glycerol and stored at -  
233 20°C.

234

235 **Western blotting.** *B. subtilis* strains were grown in LB and treated with Mitomycin C  
236 (final concentration 0.3 µg/ml) as reported in Myagmarjav, *et al* 2016. Cells were  
237 harvested by centrifugation at the different time points after treatment. Cells were  
238 resuspended to 10 OD<sub>600</sub> in Lysis buffer [20 mM Tris-HCL (pH 7.0), 10 mM EDTA, 1  
239 mg/ml lysozyme, 10 µg/ml DNase I, 100 µg/ml RNase I, 1 mM PMSF] and incubated for  
240 1 hour at 37°C. 20 µl of lysate was mixed with 4 µl 6x SDS loading dye. Samples were  
241 separated by 12% sodium dodecyl sulfate-polyacrylamide gel electrophoresis (SDS-  
242 PAGE). The proteins were electroblotted onto nitrocellulose and developed with a  
243 primary antibody used at a 1:5,000 dilution of anti-SigN, 1:80,000 dilution of anti-SigA,  
244 and a 1:10,000 dilution secondary antibody (horseradish peroxidase-conjugated goat  
245 anti-rabbit immunoglobulin G). Immunoblot was developed using the Immun-Star HRP  
246 developer kit (Bio-Rad).

247

248 **β-galactosidase Assay.** Biological replicates of *B. subtilis* strains were grown in LB  
249 and treated with Mitomycin C to a final concentration of 0.3 µg/ml. Cells were allowed to  
250 grow, and 1 ml was harvested by centrifugation at the different time points indicated  
251 after treatment. When IPTG (final concentration 1mM) was used, cells grew to an OD<sub>600</sub>  
252 0.6 and 1 ml was harvested. Cells were resuspended in 1 ml of Z-buffer (40 mM  
253 NaH<sub>2</sub>PO<sub>4</sub>, 60 mM Na<sub>2</sub>HPO<sub>4</sub>, 1mM MgSO<sub>4</sub>, 10 mM KCl, and 38 mM β-mercaptoethanol)  
254 with 0.2 mg/ml of lysozyme and incubated at 30 °C for 15 minutes. Each sample was

255 diluted accordingly with Z-buffer to 500  $\mu$ l. The reaction was started with 100  $\mu$ l of 4  
256 mg/ml O-nitrophenyl  $\beta$ -D-galactopyranoside (in Z buffer) and stopped with 1M Na<sub>2</sub>CO<sub>3</sub>  
257 (250  $\mu$ l). The OD<sub>420</sub> of each reaction was noted and the  $\beta$ -galactosidase specific activity  
258 was calculated using this equation:  $[\text{OD}_{420}/(\text{time} \times \text{OD}_{600})] \times \text{dilution factor} \times 1000$ .

259

#### 260 **Collection of cells for Rend-seq:**

261 Overnight cultures were back diluted 1:100 in LB and grown at 37 C shaking.  
262 When the cultures reached an OD<sub>600</sub> of 0.1 they were treated with either 1 ug/ml MMC  
263 (DK297 and DK3287) or 1mM IPTG (DK1634). The zpdN over expression strain was  
264 harvested 1 hour after induction by IPTG. Cells treated with MMC were collected after 2  
265 hours. After treatment, 10 ml of each culture was mixed with 10 ml of ice cold methanol  
266 and spun down at 3220  $\times$ g at 4 °C for 10 minutes. Supernatant was discarded and cell  
267 pellets were frozen in liquid nitrogen and stored at -80°C. For RNA extraction, the  
268 thawed pellets were resuspended in 1 ml of Trizol reagent (Thermo Fisher, Waltham,  
269 MA) and added to FastPrep lysis matrix B 2 ml tubes with beads (MP Biomedicals).  
270 Cells were disrupted in a Bead Ruptor 24 (Omni International, Kennesaw, GA) twice for  
271 40 seconds at 6.0 M/s. 200  $\mu$ l of chloroform was added and were kept at room temperature for  
272 2 minutes after vigorous vortexing. Mixture was spun down at 18,200  $\times$ g 30 minutes at 4  
273 °C. The aqueous phase (~600  $\mu$ l) was precipitated with 900  $\mu$ l of isopropanol for 10  
274 minutes at room temperature. The RNA pellet was collected and washed with 80%  
275 ethanol.

276

#### 277 **Rend-seq library preparation.**

278 RNA was prepared for Rend-seq as described in detail in Lalanne et al. 2018 and  
279 DeLoughery et al. 2018. In brief, 5- 10 µg RNA was DNase treated (Qiagen) and rRNA  
280 was depleted (MICROBExpress ThermoFisher). rRNA depleted RNA was fragmented  
281 by first heating the sample to 95°C for 2 min and adding RNA fragmentation buffer (1x,  
282 Thermo Fisher) for 30 seconds at 95°C and quenched by addition of RNA fragmentation  
283 stop buffer (ThermoFisher). RNA fragments between 20 and 40 bp were isolated by  
284 size excision from a denaturing polyacrylamide gel (15%, TBE-Urea, 65 min., 200 V,  
285 ThermoFisher). RNA fragments were dephosphorylated using T4 polynucleotide kinase  
286 (New England Biolabs, Ipswich, MA), precipitated, and ligated to 5' adenylated and 3'-  
287 end blocked linker 1 (IDT 5 µM) using T4 RNA ligase 2, truncated K227Q. The ligation  
288 was carried out at 25°C for 2.5 hours using <5 pmol of dephosphorylated RNA in the  
289 presence of 25% PEG 8000 (ThermoFisher). cDNA was prepared by reverse  
290 transcription of ligated RNA using Superscript III (ThermoFisher) at 50°C for 30 min.  
291 with primer oCJ485 (IDT, Coralville, Iowa) and the RNA was hydrolyzed. cDNA was  
292 isolated by PAGE size excision (10% TBE-Urea, 200V, 80 min., ThermoFisher). Single  
293 stranded cDNAs were circularized using CirLigase (Illumina, San Diego, CA) at 60°C  
294 for 2 hours. Circularized cDNA was the template for PCR amplification using Phusion  
295 DNA polymerase (New England Biolabs) with Illumina sequencing primers, primer o231  
296 (IDT) and barcoded indexing primers (IDT). After 6 – 10 rounds of PCR amplification,  
297 the product was selected by size from a non-denaturing PAGE (8% TB, 45 min., 180V,  
298 Life Technologies. For dataset names and barcode information see Table S3.

299

300 **RNA-sequencing and data analysis.**

301 Sequencing was performed on an Illumina HiSeq 2000. The 3' linker sequences were  
302 stripped. Bowtie v. 1.2.1.1 (options -v 1 -k 1) was used for sequence alignment to the  
303 reference genome NC 000964.3 (*B. subtilis* chromosome) and KF365913.1 (*B. subtilis*  
304 plasmid pBS32) obtained from NCBI Reference Sequence Bank. To deal with non-  
305 template addition during reverse transcription, reads with a mismatch at their 5' end had  
306 their 5' end re-assigned to the immediate next downstream position. The 5' and 3' ends  
307 of mapped reads between 15 and 45 nt in sizes were counted separately at genomic  
308 positions to produce wig files. The wig files were normalized per million non-rRNA and  
309 non-tRNA reads for each sample. Shadows were removed from wig files first by  
310 identifying the position of peaks and then by reducing the other end of the aligned reads  
311 by the peak's enrichment factor to produce the final normalized and shadow removed  
312 wig files. Gene regions were plotted in MATLAB.

313

314 **Electromobility Shift Assays.** To perform electromobility shift assays, LexA was  
315 purified from *E. coli* as outlined above. The control promoter,  $P_{recA}$ , was amplified using  
316 the primer set 6252/6253,  $P_{sigN}^{UP}$  was amplified using the primer set 6089/6090,  $P_{sigN}^{DN}$   
317 was amplified using the primer set 6087/6088, and  $P_{sigN}^{UP*}$  (LexA site scrambled) was  
318 amplified using the primer set 6089/6284 and 6090/6283 from *B. subtilis* 3610 genomic  
319 DNA. The  $P_{sigN}^{UP*}$  fragments were ligated using Gibson ITA assembly as outlined  
320 above. All fragments were cleaned up using the QIAquick PCR Purification Kit (Qiagen).  
321 Each DNA probe was end labeled with  $\gamma^{32}\text{P-ATP}$  with T4 PNK (New England Biolabs).  
322 Excess nucleotide was removed using G-50 microcolumns (GE Life Technologies).  
323 DNA binding reactions contained 4 nM of the DNA probe and a specific concentration of

324 purified LexA protein (either 1, 5, 10, 50, 100, or 500 nM). Reactions were carried out in  
325 binding buffer (100 mM HEPES pH 7.5, 100 mM Tris-HCl, 50% glycerol, 500 mM NaCl,  
326 10 mM EDTA, 10 mM DTT) supplemented with 100 µg/ml bovine serum albumin (BSA)  
327 and 10 ng/µl poly(dI-dC). All reactions were incubated for 45 minutes at room  
328 temperature. Protein-DNA complexes were resolved on a 6% TGE polyacrylamide gel.  
329 Gels were dried at 80°C for 90 minutes and exposed to a storage phosphor screen  
330 overnight. Gels were imaged with a Typhoon 9500 (GE Life Sciences).

331

### 332 ***in vitro* Transcription.**

333 DNA template (50 ng) was mixed with either RNAP only (250 nM) or with RNAP plus  
334 SigN (1000 nM) per reaction. Each reaction was incubated for 15 minutes at 37 °C in 25  
335 µl total reaction volume including the transcription buffer [18mM Tris HCl (pH 8.0), 10  
336 mM MgCl<sub>2</sub>, 30 mM NaCl, 1mM DTT, 250 µM GTP, 100 µM ATP, 100 µM CTP, 5 µM  
337 UTP, and ~2 µCi [ $\alpha$ -<sup>32</sup>P] UTP] to produce multiple round transcription. To stop the  
338 reaction, 25 µl of 2X Stop/Gel Loading solution (7M urea, 10 mM EDTA, 1% SDS, 2X  
339 TBE, 0.05% bromophenol blue) was used. Samples were ran on a 5% denaturing  
340 acrylamide gel [5% Acrylamide (19:1 acryl:bis), 7M urea, 1X TBE] for 3 hours at 200V.  
341 Gels were imaged with a Typhoon 9500 (GE Life Sciences).

342

### 343 **Data and software availability.**

344 Ribosome profiling and RNA-sequencing are available at the Gene Expression  
345 Omnibus under accession number **GSEXXXXX**, which can be accessed using the  
346 reviewer token **mvcjogkcvxglfez**. Data were analyzed using custom Matlab scripts which



347 are available upon request. Note to editor and reviewers: Rend-seq analysis has been  
348 submitted for database access, accession number is pending and will be provided upon  
349 revision.

## 350 **Results**

351 **SigN is repressed by LexA.** SigN (formerly ZpdN) is a sigma factor homolog encoded  
352 on the plasmid pBS32 that is necessary and sufficient for pBS32-mediated cell death  
353 (17). Consistent with previous results, treatment of cells deleted for the PBSX and SP $\beta$   
354 prophages (14, 20–23) with the DNA damaging agent mitomycin C (MMC) caused a 3-  
355 fold decrease in optical density (OD) from peak absorbance, and the decrease in OD  
356 was abolished in cells also deleted for *sigN* (17) (Fig 1A). To determine the effect of  
357 MMC on cell viability, viable counting was performed by dilution plating over a time-  
358 course following MMC addition. Addition of MMC caused a rapid and immediate decline  
359 in colony forming units such that the number of viable cells decreased three-orders of  
360 magnitude even as the OD increased for three doublings (compare Figs 1A and 1B).  
361 As with loss of OD, mutation of *sigN* abolished the MMC-dependent decrease in cell  
362 viability (Fig 1B). We conclude that pBS32-mediated cell death occurs prior to, and  
363 independent of, transient cell growth and the subsequent decline in OD, and that SigN  
364 is required for all pBS32-dependent death-related phenotypes thus far observed.

365 To determine if and when SigN was expressed relative to MMC treatment,  
366 Western blot analysis was conducted. SigN protein was first detected one hour after  
367 MMC treatment and continued to increase in abundance thereafter, whereas the  
368 vegetative sigma factor, SigA ( $\sigma^A$ ), was constitutive and did not increase (Fig 1C). We  
369 noted that loss of cell viability appeared to occur soon after MMC addition, perhaps prior  
370 to observable SigN protein (e.g. 0.5 hrs. after addition, Fig 1B), and thus we inferred  
371 that SigN was expressed and active at levels below the limit of protein detection. To  
372 determine whether SigN expression occurs soon after MMC treatment, the upstream

373 intergenic region of *sigN* ( $P_{sigN}$ ) (Fig 2A) was cloned upstream of the gene encoding  $\beta$ -  
374 galactosidase, *lacZ*, and inserted at an ectopic site in the chromosome (*aprE::P<sub>sigN</sub>-*  
375 *lacZ*). Expression from  $P_{sigN}$  was low but increased 10-fold within an hour after MMC  
376 addition ( $T_1$ ), and the increase in expression was not dependent on the presence of  
377 pBS32 (Fig 3A).

378 To map the MMC-response within the *sigN* promoter region, we split the  $P_{sigN}$   
379 region into two fragments, an upstream fragment called  $P_{sigN}^{UP}$  and a downstream  
380 fragment called  $P_{sigN}^{DN}$  (Fig 2A). Both fragments were cloned upstream of *lacZ* and  
381 separately integrated into an ectopic site of the chromosome in a strain deleted for  
382 pBS32 and both chromosomal prophages, PBSX and SP $\beta$ . Basal expression from  
383  $P_{sigN}^{UP}$  was at background levels but increased 100-fold when MMC was added (Fig  
384 3B). In contrast, expression from  $P_{sigN}^{DN}$  was expressed at a constitutively low level and  
385 did not increase upon addition of MMC (Fig. 3B). We conclude that transcription of  
386 *sigN* is activated by MMC treatment, that the  $P_{sigN}^{UP}$  region contains an MMC-  
387 responsive promoter, and that MMC-dependent expression was controlled by a  
388 chromosomally-encoded regulator as induction was not dependent on the presence of  
389 pBS32.

390 One candidate for an MMC-responsive, chromosomally-encoded regulator is the  
391 transcriptional repressor protein LexA. LexA often binds to sequences that overlaps  
392 promoters to inhibit access of RNA polymerase holoenzyme (24, 25), and sequence  
393 analysis predicted a putative LexA-inverted repeat binding site located within the  $P_{sigN}^{UP}$   
394 fragment (26, 27) (Supp. Fig 1). Moreover, target promoters are exposed and  
395 expression is de-repressed when LexA undergoes auto-proteolysis upon DNA damage

396 like that caused by MMC (24, 25, 28). To determine if  $P_{sigN}^{UP}$  was LexA repressed,  
397 LexA was mutated in a background deleted for pBS32 and the two chromosomal  
398 prophages, PBSX and SP $\beta$ . Mutation of *lexA* dramatically increased expression from  
399  $P_{sigN}^{UP}$  but not  $P_{sigN}^{DN}$  (Fig 3C). We conclude that LexA either directly or indirectly  
400 inhibits expression of a promoter present in  $P_{sigN}^{UP}$ .

401 One way that LexA might inhibit expression from  $P_{sigN}^{UP}$  is if it bound directly to  
402 the DNA. To determine whether LexA bound directly to the  $P_{sigN}^{UP}$  region, LexA was  
403 purified and added to various labeled DNA fragments in an electrophoretic mobility shift  
404 assay (EMSA). Consistent with direct, high-affinity binding, purified LexA caused an  
405 electrophoretic mobility shift in both the previously established target promoter  $P_{recA}$  (25)  
406 (Fig 4A) and the  $P_{sigN}^{UP}$  promoter region (Fig 4B) at protein levels as low as 1 nM. LexA  
407 binding was specific as the affinity was reduced 500-fold for the  $P_{sigN}^{DN}$  promoter (Fig  
408 4C). Moreover, LexA binding was specific for the putative LexA inverted repeat  
409 sequence as mutation of the sequence (GAAC > TTAC) within  $P_{sigN}^{UP}$  reduced binding  
410 affinity 100-fold (Fig 4D). We conclude that LexA binds to the  $P_{sigN}^{UP}$  promoter region  
411 and represses transcription.

412 LexA often binds overtop of promoter elements (16), and sequence analysis  
413 suggested that the LexA inverted repeat in  $P_{sigN}^{UP}$  might rest immediately upstream of,  
414 an overlap with, a putative SigA-dependent -35 promoter element (Fig 2B). To  
415 determine whether  $P_{sigN}^{UP}$  contained a SigA-dependent promoter, RNA polymerase  
416 (RNAP) holoenzyme with SigA bound was purified from *B. subtilis* and used in an *in*  
417 *vitro* transcription reaction (Fig 5). Consistent with promoter activity, transcription  
418 product was observed when SigA-RNAP was mixed with either a known SigA-

419 dependent promoter control  $P_{veg}$  (Fig 5A, left lane), or the experimental  $P_{sigN}^{UP}$  (Fig 5B,  
420 left lane). A transcription product was also observed when SigA-RNAP was mixed with  
421 the  $P_{sigN}^{DN}$  promoter fragment (Fig 5C, left lane), consistent with low level constitutive  
422 expression observed from reporters with that fragment (Fig 3B). We conclude that there  
423 are two SigA-dependent promoters within the  $P_{sigN}$  region, one within the  $P_{sigN}^{UP}$   
424 fragment and one within  $P_{sigN}^{DN}$  fragment.

425 To determine transcriptional start sites, Rend-seq (end-enriched RNA-seq)  
426 analysis was performed for the entire *B. subtilis* transcriptome in the presence and  
427 absence of MMC-treatment (Fig 2B). Rend-seq achieves end-enrichment by sparse  
428 fragmentation of extracted RNAs, which generates fragments containing original 5' and  
429 3' ends, as well as a lower amount of fragments containing internal ends (29, 30). Rend-  
430 seq indicated that expression of *sigN* was low in the absence of induction (Fig 2C) but a  
431 5' end appeared within the  $P_{sigN}^{UP}$  region when MMC was added, the location of which  
432 was consistent with the SigA -10 promoter element predicted earlier (Fig 2B) and  
433 supported later by *in vitro* transcription (Fig 5A, left lane). We define the SigA-  
434 dependent promoter within  $P_{sigN}^{UP}$  as  $P_{sigN1}$ . Rend-seq also indicated a weak but MMC-  
435 independent 5' end within  $P_{sigN}^{DN}$  that was consistent with the *in vitro* transcription  
436 product originating from that fragment (Fig 5B, left lane). Moreover, sequences  
437 consistent with -35 and -10 promoter elements were identified upstream of the 5' end  
438 within  $P_{sigN}^{DN}$  (Fig 2B). We define the weak constitutive SigA-dependent promoter  
439 within  $P_{sigN}^{DN}$  as  $P_{sigN2}$ . We conclude that there are two SigA-dependent promoters  
440 driving *sigN* expression, and that  $P_{sigN1}$  is both strong and LexA-repressed.

441

442 **SigN is a sigma factor that activates its own expression.** Rend-seq analysis also  
443 indicated a second 5' end within  $P_{sigN}^{DN}$  fragment that would result in a slightly shorter  
444 transcript (Fig 2B, peak marked  $P_?$ ). The shorter transcript could indicate either a highly  
445 specific RNA cleavage site in the 5' upstream untranslated region of *sigN*, or the  
446 presence of a third promoter with an individual start site. If there was a second promoter  
447 within  $P_{sigN}^{DN}$ , the promoter was presumably not dependent on SigA as only one SigA-  
448 dependent transcript was observed from this fragment in *in vitro* transcription assays  
449 (Fig 5B). One candidate for an alternative sigma factor that could drive expression of  
450 the third putative promoter is SigN itself. SigN is homologous to extra-cytoplasmic  
451 function (ECF) sigma factors and ECF sigma factors are often autoregulatory (31).  
452 Consistent with autoactivation, induction of SigN increased expression from  $P_{sigN}^{DN}$ -lacZ  
453 100-fold but did not increase expression from  $P_{sigN}^{UP}$  (Fig 3C). We conclude that *sigN*  
454 expression is controlled by at least three promoters: a LexA-repressed SigA-dependent  
455 promoter  $P_{sigN1}$ , a weak constitutive SigA-dependent promoter  $P_{sigN2}$ , and a third  
456 promoter that was SigN-dependent.

457 One way in which a promoter could be SigN-dependent is if SigN is a *bona fide*  
458 sigma factor that directs its transcription. To determine whether SigN had sigma factor  
459 activity, RNAP-SigA holoenzyme was purified from *B. subtilis* and purified SigN protein  
460 was added in 5-fold excess in *in vitro* transcription reactions(32–34). Addition of SigN  
461 reduced levels of the SigA-dependent  $P_{veg}$ ,  $P_{sigN1}$ , and the  $P_{sigN2}$ -derived transcripts,  
462 consistent with SigN competing with, and displacing, SigA from the RNA polymerase  
463 core (Fig. 5, right lanes). Moreover, a new shorter transcript appeared within  $P_{sigN}^{DN}$  that  
464 was SigN-dependent (Fig 5C, right lane). To map the location of the shorter transcript,

465 Rend-seq was conducted on a strain that was artificially induced for SigN expression.  
466 Consistent with the *in vitro* transcription results, an intense SigN-dependent 5' end was  
467 detected within the  $P_{sigN}^{DN}$  region which we infer is due to the presence of a promoter  
468 here called,  $P_{sigN3}$  (Fig 2C). We note that the  $P_{sigN3}$ -dependent transcript did not align  
469 with the original transcript peak from  $P_?$  indicated by Rend-seq analysis and thus at  
470 least three and possibly more promoters may be present upstream of *sigN*. Moreover,  
471 both the  $P_?$  and  $P_{sigN3}$ - dependent peaks in the MMC-treated REND-seq, were abolished  
472 in *sigN* mutant cells (Fig 2C). Nonetheless, we conclude that SigN is a bona fide sigma  
473 factor that is necessary and sufficient for inducing expression from  $P_{sigN3}$ .

474 Mapping of the Rend-seq transcriptional start site, allowed prediction of the  $P_{sigN3}$   
475 promoter sequence (Fig 2B). To determine a SigN consensus sequence, 40 base pairs  
476 of sequence upstream of each pBS32 5' end of transcript as determined by Rend-seq  
477 analysis after SigN artificial expression were collected and compiled by MEME (35) (Fig  
478 2D). A consensus sequence emerged that was consistent with the -35 and -10 regions  
479 predicted by distance analysis for  $P_{sigN3}$  (Fig 2B). Three separate promoter regions  
480 predicted thought to be regulated by SigN were cloned upstream of a promoter-less  
481 *lacZ* gene and inserted at an ectopic site in the chromosome in a strain deleted for  
482 pBS32. In each case, the expression of the reporter was low during normal growth  
483 conditions but increased 100-fold when *sigN* was induced with IPTG (Fig 3E). We  
484 conclude that SigN is a plasmid-encoded sigma factor that is necessary and sufficient  
485 for the expression of a regulon genes encoded on pBS32, and we infer that the  
486 expression of one or more genes within the SigN regulon is responsible for pBS32-  
487 mediated cell death.

488

489



## 490 **DISCUSSION**

491           Previously published results showed that the SigN primary sequence exhibited  
492 homology to other well-known sigma factors present in *B. subtilis* (17) and here we  
493 show that SigN exhibits sigma factor activity *in vitro*. Moreover, using Rend-seq analysis  
494 we determine the regulon of genes under SigN control and use transcriptional start sites  
495 and to identify a consensus binding sequence (Fig 2C). While plasmid-encoded sigma  
496 factors are rare, SigN is conserved on *Bacillus* plasmids that are closely related to  
497 pBS32 such as pLS32 or pBUYYP1. Alternative sigma factors or analogs thereof are  
498 sometimes encoded within prophage elements (36–39), and pBS32 encodes what  
499 appears to be a cryptic prophage. Whether pBS32 in its entirety is a P1-like plasmid  
500 prophage (40), or whether a phage secondarily lysogenized into a preexisting plasmid is  
501 unknown but pBS32 in its entirety appears to be released on cell death in a capsid-  
502 dependent DNase-resistant form (17). Regardless, induction of SigN is necessary and  
503 sufficient to cause cell death in a manner dependent on pBS32.

504           Similar to, and perhaps consistent with, other lysogenic prophages in *B. subtilis*,  
505 DNA damage caused by MMC triggers hyper-replication of pBS32 and initiates pBS32-  
506 mediated cell death (16, 17, 41). Here we show that MMC induces the plasmid via the  
507 chromosomally-encoded transcriptional repressor LexA (Fig 6). LexA tightly represses  
508 the  $P_{sigN1}$  promoter, and MMC-mediated DNA damage promotes the auto-proteolysis of  
509 LexA (28, 42–44). De-repression of  $P_{sigN1}$  leads to high-level *sigN* expression and once  
510 expressed, SigN locks the system into an activated state by positive feedback at the  
511  $P_{sigN3}$  promoter. SigN directs not only its own expression but an entire regulon on pBS32  
512 which includes many genes homologous to those involved in nucleotide metabolism and

513 DNA replication (Table 2). Thus, SigN activation cause pBS32 copy number to increase  
514 100-fold and either directly or indirectly promote cell death.

515 How pBS32 actually kills cells is still unknown. Here we show that cells activated  
516 for SigN in the presence of pBS32 continue to grow for three generations even as cell  
517 viability rapidly declines. Thus, toxicity likely isn't due to direct inhibition of essential  
518 components and instead, something essential is depleted, diluted through growth and  
519 not replaced. Hyper-replication of the plasmid may deplete nucleotide pools but at  
520 present we cannot determine whether hyper-replication and death are linked or  
521 separate phenotypes. Finally, death might be mediated by the prophage structural and  
522 lytic genes, but we note that SigN-dependent promoters appear to be largely excluded  
523 from the prophage region and while prophage gene expression increases, the increase  
524 may be largely due to the increase in plasmid copy number. Finally, large deletions of  
525 the prophage structural genes were insufficient to abolish pBS32-mediated cell death  
526 (17). Thus, prophage gene expression may be separate from SigN-mediate death as  
527 well.

528 Members of the extracytoplasmic sigma factor (ECF) family are typically induced  
529 by extracellular signals and promote gene expression to adapt to environment stress  
530 (45, 46). Here we show that SigN is a functional ECF-like sigma that responds to  
531 internal signals in the form of DNA damage and in turn, promotes cell death. Why cells  
532 encode a sigma factor that induces cell death is unknown. Moreover, SigN appears to  
533 be unlike most ECF sigma factors as it does not appear to be regulated by a co-  
534 expressed cognate anti-sigma. Thus, if and how SigN is regulated independently of the  
535 DNA damage response, is unknown. We note however that there is a third weak but

536 constitutive promoter  $P_{sigN2}$  that also drives expression of SigN. The function of  $P_{sigN2}$   
537 and why  $P_{sigN2}$  is insufficient to promote SigN-mediated cell death is unknown. We  
538 speculate however, that  $P_{sigN2}$  may either provide for additional environmental regulation  
539 on SigN or be an irrelevant vestige of former regulation. Ultimately, why *B. subtilis*  
540 retains a potentially lethal plasmid and a sigma factor that promotes cell death is  
541 unknown.

542

543

544

545 **ACKNOWLEDGEMENTS**

546 Alyssa Ball, Ryan Chaparian, Felix Dempwolff, Masaya Fujita, Kate Hummels, Bat-  
547 Erdene Magyarjav, Reid Oshiro, Sundharraman Subramanian, Lauren Wahle and Julia  
548 van Kessel for technical support. This work was supported by NIH R35GM124732 to  
549 GWL and NIH Grant R35GM131783 to DBK.

550

551

552 **Table 1: Strains**

| Strain | Genotype                                                                                                   |
|--------|------------------------------------------------------------------------------------------------------------|
| 3610   | Wild type                                                                                                  |
| DS4203 | <i>rpoC-hisX6Ω neo(kan)</i>                                                                                |
| DK297  | $\Delta SP\beta \Delta PBSX$ (Myagmarjav et al., 2016)                                                     |
| DK451  | $\Delta SP\beta \Delta PBSX \Delta pBS32$ (Myagmarjav et al., 2016)                                        |
| DK607  | $\Delta SP\beta \Delta PBSX \Delta comI$                                                                   |
| DK1634 | $\Delta SP\beta \Delta PBSX \Delta comI amyE::P_{hyspank-zpdN}^{wKRBS} spec$ (Myagmarjav et al., 2016)     |
| DK2862 | $aprE::P_{haq}^{Q12L}-lacZ cat comI$                                                                       |
| DK3287 | $\Delta SP\beta \Delta PBSX \Delta comI \Delta sigN$ (Myagmarjav et al., 2016)                             |
| DK4784 | $\Delta SP\beta \Delta PBSX aprE::P_{sigN}-lacZ cat$                                                       |
| DK5066 | $\Delta SP\beta \Delta PBSX \Delta pBS32 aprE::P_{sigN}-lacZ cat$                                          |
| DK5655 | $\Delta SP\beta \Delta PBSX \Delta comI amyE::P_{hyspank-sigN}^{wKRBS} spec thrC::P_{sigN}^{UP}-lacZ mls$  |
| DK5656 | $\Delta SP\beta \Delta PBSX \Delta comI amyE::P_{hyspank-sigN}^{wKRBS} spec thrC::P_{sigN}^{DN}-lacZ mls$  |
| DK5657 | $\Delta SP\beta \Delta PBSX \Delta pBS32 amyE::P_{hyspank-sigN}^{wKRBS} spec thrC::P_{sigN}^{UP}-lacZ mls$ |
| DK5658 | $\Delta SP\beta \Delta PBSX \Delta pBS32 amyE::P_{hyspank-sigN}^{wKRBS} spec thrC::P_{sigN}^{DN}-lacZ mls$ |
| DK5968 | $\Delta SP\beta \Delta PBSX \Delta pBS32 amyE::P_{hyspank-sigN}^{wKRBS} spec thrC::P_{zpcJ}-lacZ mls$      |
| DK5969 | $\Delta SP\beta \Delta PBSX \Delta pBS32 amyE::P_{hyspank-sigN}^{wKRBS} spec thrC::P_{zpcX}-lacZ mls$      |
| DK5970 | $\Delta SP\beta \Delta PBSX \Delta pBS32 amyE::P_{hyspank-sigN}^{wKRBS} spec thrC::P_{zpdG}-lacZ mls$      |
| DK7259 | $\Delta SP\beta \Delta PBSX \Delta pBS32 lexA::mls aprE::P_{sigN}^{UP}-lacZ cat$                           |
| DK7260 | $\Delta SP\beta \Delta PBSX \Delta pBS32 lexA::mls aprE::P_{sigN}^{DN}-lacZ cat$                           |
| DK7291 | $\Delta SP\beta \Delta PBSX \Delta pBS32 aprE::P_{sigN}^{UP}-lacZ cat$                                     |
| DK7292 | $\Delta SP\beta \Delta PBSX \Delta pBS32 aprE::P_{sigN}^{DN}-lacZ cat$                                     |

553

554

555 **Table 2: SigN-dependent promoters on pBS32**

| Promoter <sup>a</sup> | Sequence <sup>b</sup>                       | Operon <sup>c</sup> | Function <sup>d</sup> |
|-----------------------|---------------------------------------------|---------------------|-----------------------|
| <i>sigN</i>           | TTTTCGTTTACGTTTCTATTTCTCTAGATAAAAATCATTAAG  | <i>sigN</i>         | Sigma factor          |
| <i>zpaB</i>           | TTCTCATTTTACGTTTTAGAAAAGACTAGATATAAAGATTACG | <i>zpaB</i>         | DNA gyrase            |
| <i>zpaD</i>           | TCTTATTTACATAACTGGTTATGCCGGATAAAAAGAAGATAG  | <i>zpaDE</i>        | unknown               |
| <i>zpbP</i>           | CTACCAATTTACGTTTCCACCATTTCTCAGATATAAATATATT | <i>zpbP</i>         | unknown               |
| <i>zpbS</i>           | TTTTGATTTACGAATTCATATTCATAGATATAAGTATAAAA   | <i>zpbS</i>         | PG interaction        |
| <i>zpbW</i>           | TCCATTAATTTACATATGGAAAATTACGGATATAATCGTTA   | <i>zpbW</i>         | Regulator             |
| <i>zpbY</i>           | GAAAATCAATTTACGTTTTCAAAAGGCACAGATATAAATAACA | <i>zpbYZzpcABCD</i> | unknown               |
| <i>zpcE</i>           | TTTTTGATTTACGTTTCTAAAACCCAAGATATAAAAAGATAT  | <i>zpcEFGH</i>      | Nucleotide synth.     |
| <i>zpcJ</i>           | AATTAATTTACGTTTTCCAAGAACCAGATATAAATAAAAAG   | <i>zpcJK</i>        | Nucleotide synth.     |
| <i>zpcL</i>           | TTTTGATTTACGTTTTTAATACTCCAGATATAAATATTAAG   | <i>zpcLM</i>        | Nucleotide synth.     |
| <i>zpcN</i>           | TTATGATTTACGTTTTTGTTTACCCAGATAAAAATAACAAAG  | <i>zpcNOP</i>       | unknown               |
| <i>zpcU</i>           | GCTTGATTTACGTTTTAAAAACCCAGATATAAATAACGAAG   | <i>zpcUV</i>        | Exonuclease           |
| <i>zpcX</i>           | CATTAATTTACGTTTTCGAATCACCAGATATAAATAAAGAG   | <i>zpcXYZ</i>       | Nucleotide synth.     |
| <i>zpdB</i>           | TTTCAATTTACGTTTTCGAATCACCAGATATAAATACAAAG   | <i>zpdBCDEF</i>     | Nucleotide synth.     |
| <i>zpdG</i>           | ATCCAATTTACGTTTTTGCCGGTCCAGATATAAATACTTTG   | <i>zpdG</i>         | DNA Pol III           |
| <i>zpdH1</i>          | TCATAATTTACATTTCTGTTATAACCGATATAATACCCTCA   | <i>zpdHIJKLM</i>    | Nucleotide synth.     |
| <i>zpdH2</i>          | AAATGATTTACGTTTTTCAATAACCAGATATAAATATAAAG   | <i>zpdHIJKLM</i>    | Nucleotide synth.     |

556 aPromoter named by the first gene encoded on the transcript predicted by RENDseq analysis.  
 557 bSequence of promoter obtained by taking the -40 to +1 position relative to the transcript predicted by  
 558 RENDseq analysis and used to generate Fig 2D.  
 559 cOperon obtained by the 3' end of the transcript predicted by RENDseq analysis  
 560 dFunction of gene/operon taken from BLAST results published in Konkol et al., 2013 J Bacteriol.  
 561

562 **REFERENCES:**

- 563 1. Stanley NR, Lazazzera BA. 2005. Defining the genetic differences between wild  
564 and domestic strains of *Bacillus subtilis* that affect poly- $\gamma$ -dl-glutamic acid  
565 production and biofilm formation. *Mol Microbiol* 57:1143–1158.
- 566 2. McLoon AL, Guttenplan SB, Kearns DB, Kolter R, Losick R. 2011. Tracing the  
567 Domestication of a Biofilm Forming Bacterium. *J Bacteriol* 193:2027–2034.
- 568 3. Kearns DB, Chu F, Rudner R, Losick R. 2004. Genes governing swarming in  
569 *Bacillus subtilis* and evidence for a phase variation mechanism controlling surface  
570 motility. *Mol Microbiol*.
- 571 4. Zeigler DR, Prágai Z, Rodriguez S, Chevreux B, Muffler A, Albert T, Bai R, Wyss  
572 M, Perkins JB. 2008. The Origins of 168, W23, and Other *Bacillus subtilis*  
573 Legacy Strains. *J Bacteriol* 190:6983 LP-6995.
- 574 5. Nakano MM, Marahiel MA, Zuber P. 1988. Identification of a genetic locus  
575 required for biosynthesis of the lipopeptide antibiotic surfactin in *Bacillus subtilis* .  
576 *J Bacteriol* 170:5662 LP-5668.
- 577 6. Earl AM, Losick R, Kolter R. 2007. *Bacillus subtilis* Genome Diversity. *J Bacteriol*  
578 189:1163 LP-1170.
- 579 7. Konkol MA, Blair KM, Kearns DB. 2013. Plasmid-encoded ComI Inhibits  
580 Competence in the Ancestral 3610 Strain of *Bacillus subtilis*. *J Bacteriol*  
581 195:4085–4093.
- 582 8. Tanaka T, Ishida H, Maehara T. 2005. Characterization of the replication region of  
583 plasmid pLS32 from the natto strain of *Bacillus subtilis*. *J Bacteriol* 187:4315–  
584 4326.

- 585 9. Tanaka T, Ogura M. 1998. A novel *Bacillus natto* plasmid pLS32 capable of  
586 replication in *Bacillus subtilis*. FEBS Lett 422:243–246.
- 587 10. Becker E, Herrera NC, Gunderson FQ, Derman AI, Dance AL, Sims J, Larsen RA,  
588 Pogliano J. 2006. DNA segregation by the bacterial actin AlfA during *Bacillus*  
589 *subtilis* growth and development. EMBO J 25:5919–5931.
- 590 11. Parashar V, Konkol MA, Kearns DB, Neiditch MB. 2013. A Plasmid-Encoded  
591 Phosphatase Regulates *Bacillus subtilis* Biofilm Architecture, Sporulation, and  
592 Genetic Competence. J Bacteriol 195:2437–2448.
- 593 12. Bendori SO, Pollak S, Hizi D, Eldar A. 2015. The RapP-PhrP Quorum-Sensing  
594 System of *Bacillus subtilis* Strain NCIB3610 Affects Biofilm Formation through  
595 Multiple Targets, Due to an Atypical Signal-Insensitive Allele of RapP. J Bacteriol  
596 197:592–602.
- 597 13. Lyons NA, Kolter R. 2018. A single mutation in rapP induces cheating to prevent  
598 cheating in *Bacillus subtilis* by minimizing public good production. Commun Biol  
599 1:133.
- 600 14. Okamoto K, Mudd JA, Marmur J. 1968. Conversion of *Bacillus subtilis* DNA to  
601 phage DNA following mitomycin C induction. J Mol Biol 34:429–437.
- 602 15. Mauël C, Karamata D. 1984. Characterization of proteins induced by mitomycin C  
603 treatment of *Bacillus subtilis*. J Virol 49:806 LP-812.
- 604 16. Goranov AI, Kuester-Schoeck E, Wang JD, Grossman AD. 2006. Characterization  
605 of the global transcriptional responses to different types of DNA damage and  
606 disruption of replication in *Bacillus subtilis*. J Bacteriol 188:5595–5605.
- 607 17. Myagmarjav B-E, Konkol MA, Ramsey J, Mukhopadhyay S, Kearns DB. 2016.



- 608 ZpdN, a Plasmid-Encoded Sigma Factor Homolog, Induces pBS32-Dependent  
609 Cell Death in *Bacillus subtilis*. J Bacteriol 198:2975–2984.
- 610 18. Yasbin RE, Young FE. 1974. Transduction in *Bacillus subtilis* by bacteriophage  
611 SPP1. J Virol 14:1343–1348.
- 612 19. Gibson DG, Young L, Chuang R-Y, Venter JC, Hutchison CA, Smith HO. 2009.  
613 Enzymatic assembly of DNA molecules up to several hundred kilobases. Nat  
614 Methods 6:343–345.
- 615 20. Wood HE, Dawson MT, Devine KM, McConnell DJ. 1990. Characterization of  
616 PBSX, a defective prophage of *Bacillus subtilis*. J Bacteriol 172:2667 LP-2674.
- 617 21. Warner FD, Kitos GA, Romano MP, Hemphill HE. 1977. Characterization of SPβ:  
618 a temperate bacteriophage from *Bacillus subtilis* 168M. Can J Microbiol 23:45–51.
- 619 22. Lazarevic V, Düsterhöft A, Soldo B, Hilbert H, Mauël C, Karamata D. 1999.  
620 Nucleotide sequence of the *Bacillus subtilis* temperate bacteriophage SPβc2.  
621 Microbiology 145:1055–1067.
- 622 23. Seaman E, Tarmy E, Marmur J. 1964. Inducible Phages of *Bacillus subtilis* .  
623 Biochemistry.
- 624 24. Winterling KW, Levine AS, Yasbin RE, Woodgate R. 1997. Characterization of  
625 DinR, the *Bacillus subtilis* SOS Repressor. J Bacteriol 179:1698–1703.
- 626 25. Groban ES, Johnson MB, Banky P, Burnett PGG, Calderon GL, Dwyer EC, Fuller  
627 SN, Gebre B, King LM, Sheren IN, Von Mutius LD, O’Gara TM, Lovett CM. 2005.  
628 Binding of the *Bacillus subtilis* LexA protein to the SOS operator. Nucleic Acids  
629 Res 33:6287–6295.
- 630 26. Raymond-Denise A, Guillen N. 1991. Identification of *dinR* , a DNA damage-

- 631 inducible regulator gene of *Bacillus subtilis*. J Bacteriol 173:7084 LP-7091.
- 632 27. Winterling KW, Chafin D, Hayes JJ, Sun J, Levine AS, Yasbin RE, Woodgate R.  
633 1998. The *Bacillus subtilis* DinR Binding Site: Redefinition of the Consensus  
634 Sequence. J Bacteriol 180:2201 LP-2211.
- 635 28. Miller MC, Resnick JB, Smith BT, Lovett CM. 1996. The *Bacillus subtilis* *dinR*  
636 gene codes for the analogue of *Escherichia coli* LexA. J Biol Chem 271:33502–  
637 33508.
- 638 29. Lalanne J-B, Taggart JC, Guo MS, Herzel L, Schieler A, Li G-W. 2018.  
639 Evolutionary Convergence of Pathway-Specific Enzyme Expression  
640 Stoichiometry. Cell 173:749–761.e38.
- 641 30. DeLoughery A, Lalanne J-B, Losick R, Li G-W. 2018. Maturation of polycistronic  
642 mRNAs by the endoribonuclease RNase Y and its associated Y-complex in  
643 *Bacillus subtilis*. Proc Natl Acad Sci 115:e5585-5594.
- 644 31. Staroń A, Sofia HJ, Dietrich S, Ulrich LE, Liesegang H, Mascher T. 2009. The  
645 third pillar of bacterial signal transduction: Classification of the extracytoplasmic  
646 function (ECF)  $\sigma$  factor protein family. Mol Microbiol 74:557–581.
- 647 32. Fujita M. 2000. Temporal and selective association of multiple sigma factors with  
648 RNA polymerase during sporulation in *Bacillus subtilis*. Genes to Cells 5:79–88.
- 649 33. Fujita M, Sadaie Y. 1998. Rapid isolation of RNA polymerase from sporulating  
650 cells of *Bacillus subtilis*. Gene 221:185–190.
- 651 34. Fujita M, Sadaie Y. 1998. Promoter selectivity of the *Bacillus subtilis* RNA  
652 polymerase sigmaA and sigmaH holoenzymes. J Biochem 124:89–97.
- 653 35. Bailey TL, Boden M, Buske FA, Frith M, Grant CE, Clementi L, Ren J, Li WW,

- 654 Noble WS. 2009. MEME Suite: Tools for motif discovery and searching. *Nucleic*  
655 *Acids Res* 37:202–208.
- 656 36. McDonnell GE, Wood H, Devine KM, McConnell DJ. 1994. Genetic control of  
657 bacterial suicide: regulation of the induction of PBSX in *Bacillus subtilis*. *J*  
658 *Bacteriol* 176:5820 LP-5830.
- 659 37. Pero J, Tjian R, Nelson J, Losick R. 1975. *In vitro* transcription of a late class of  
660 phage SP01 genes. *Nature* 257:248–251.
- 661 38. Fox TD, Losick R, Pero J. 1976. Regulatory gene 28 of bacteriophage SPO1  
662 codes for a phage-induced subunit of RNA polymerase. *J Mol Biol* 101:427–433.
- 663 39. Talkington C, Pero J. 1979. Distinctive nucleotide sequences of promoters  
664 recognized by RNA polymerase containing a phage-coded “sigma-like” protein.  
665 *Proc Natl Acad Sci* 76:5465 LP-5469.
- 666 40. Ikeda H, Tomizawa J. 1968. Prophage P1, an Extrachromosomal Replication  
667 Unit. *Cold Spring Harb Symp Quant Biol* 33:791–798.
- 668 41. McVeigh RR, Yasbin RE. 1996. Phenotypic differentiation of “ smart ” versus “  
669 naive ” bacteriophages of *Bacillus subtilis* . These include : Phenotypic  
670 Differentiation of “ Smart ” versus “ Naive ” Bacteriophages of *Bacillus subtilis*. *J*  
671 *Bacteriol* 178:3399–3401.
- 672 42. Little JW. 1984. Autodigestion of *lexA* and phage lambda repressors. *Proc Natl*  
673 *Acad Sci* 81:1375–1379.
- 674 43. Little JW, Edmiston SH, Pacelli LZ, Mount DW. 1980. Cleavage of the *Escherichia*  
675 *coli lexA* protein by the *recA* protease. *Proc Natl Acad Sci U S A* 77:3225–9.
- 676 44. Butala M, Žgur-Bertok D, Busby SJW. 2009. The bacterial LexA transcriptional

677 repressor. Cell Mol Life Sci.

678 45. Helmann JD. 2002. The extracytoplasmic function (ECF) sigma factors. Adv

679 Microb Physiol 46:47–110.

680 46. Feklístov A, Sharon BD, Darst SA, Gross CA. 2014. Bacterial Sigma Factors: A

681 Historical, Structural, and Genomic Perspective. Annu Rev Microbiol 68:357–376.

## 682 **FIGURE LEGENDS**

683

684 **Figure 1: SigN is required for loss of cell viability after MMC treatment.** A) Optical

685 density (OD<sub>600</sub>) growth curve of wild type (open circles, DK607) and sigN mutant (closed

686 circles, DK3287). X-axis is time of spectrophotometry after MMC addition. B) Colony

687 forming unit growth curve of wild type (open circles, DK607) and sigN mutant (closed

688 circles, DK3287). X-axis is time of dilution plating after MMC addition. C) Western blot

689 analysis of wild type DK607 cell lysates harvested at the indicated time after MMC

690 addition and probed with either anti-SigN antibody or anti-SigA antibody. On right is a

691 single panel of the same strain for comparison 2 hours after mock MMC addition.

692

693 **Figure 2: SigN promoter region.** (A) A schematic of the promoter region of *sigN*.

694 Open arrows indicate reading frames. Bent arrows indicate promoters. Promoter

695 regions are indicated by brackets. (B) Promoter sequences. Boxes surround -35 and -

696 10 regions relative to the +1 transcriptional start site. Below the promoters are SigA and

697 SigN consensus sequences with vertical lines to indicate a consensus match. C)

698 REND-seq data for the indicated genotypes: WT (DK607), WT+MMC (DK607 induced

699 for 1 hr with MMC), *sigN*<sup>+++</sup> (DK1634 induced for 1 hr with 1 mM IPTG), and

700  $\Delta sigN$ +MMC (DK3287 induced for 1 hr with MMC). Orange peaks represent 5' ends  
701 and blue peaks represent 3' ends. Below is a cartoon indicating the location of the  
702 promoter believed to be responsible for transcriptional start sites predicted above  
703 relative to the *sigN* coding region. Note, the peaks stop abruptly in the last panel due to  
704 deletion of the *sigN* gene. Information on RENDseq is included in Table S3. (D) SigN  
705 consensus sequence generated by MEME sequence analysis using the promoters  
706 listed in Table 2.

707

708 **Figure 3: The *sigN* promoter region is repressed by LexA and autoactivated.** (A)

709  $\beta$ -galactosidase activity of a  $P_{sigN}$ -*lacZ* reporter in the presence (open bars) and  
710 absence (closed bars) of pBS32 measured at the indicated timepoints following 800nM

711 MMC addition. The following strains were used to generate this panel: DK4784 (WT)

712 and DK5066 ( $\Delta pBS32$ ). B)  $\beta$ -galactosidase activity of either a  $P_{sigN}^{UP}$ -*lacZ* or  $P_{sigN}^{DN}$ -

713 *lacZ* reporter in the presence (closed bars) and absence (open bars) of 800nM MMC (1

714 hour incubation). The following strains were used to generate this panel: DK5657

715 ( $P_{sigN}^{UP}$ -*lacZ*  $\Delta pBS32$ ) and DK5658 ( $P_{sigN}^{DN}$ -*lacZ*  $\Delta pBS32$ ). C)  $\beta$ -galactosidase activity

716 of either a  $P_{sigN}^{UP}$ -*lacZ* or  $P_{sigN}^{DN}$ -*lacZ* reporter in the presence (closed bars) and

717 absence (open bars) of LexA. The following strains were used to generate this panel:

718 DK7291 ( $P_{sigN}^{UP}$ -*lacZ*  $\Delta pBS32$ ), DK7292 ( $P_{sigN}^{DN}$ -*lacZ*  $\Delta pBS32$ ), DK7259  $P_{sigN}^{UP}$ -*lacZ*

719  $\Delta pBS32$  *lexA*), and DK7260 ( $P_{sigN}^{DN}$ -*lacZ*  $\Delta pBS32$  *lexA*). D)  $\beta$ -galactosidase activity of

720 either a  $P_{sigN}^{UP}$ -*lacZ* or  $P_{sigN}^{DN}$ -*lacZ* reporter in strain containing and IPTG-inducible

721 SigN construct grown in the presence (closed bars) and absence (open bars) of 1 mM

722 IPTG. The following strains were used to generate this panel: DK5657 ( $P_{sigN}^{UP}$ -*lacZ*

723  $\Delta pBS32$ ) and DK5658 ( $P_{sigN}^{DN}-lacZ \Delta pBS32$ ). E)  $\beta$ -galactosidase activity of a  $P_{zpdG}-lacZ$ ,  
724  $P_{zpcJ}-lacZ$  or  $P_{zpcX}-lacZ$  reporter in strain containing and IPTG-inducible SigN construct  
725 grown in the presence (closed bars) and absence (open bars) of 1 mM IPTG. The  
726 following strains were used to generate this panel: DK5970 ( $P_{zpdG}-lacZ \Delta pBS32$ ),  
727 DK5968 ( $P_{zpcJ}-lacZ \Delta pBS32$ ), and DK5969 ( $P_{zpcX}-lacZ \Delta pBS32$ ). Error bars are the  
728 standard deviation of three replicates. Data used to generate each panel is included in  
729 Table S4-S8.

730

731 **Figure 4: LexA binds to the  $P_{sigN}^{UP}$  promoter region.** Electrophoretic mobility shift  
732 assays were performed with radiolabeled DNA of PrecA (A), P<sub>sigNUP</sub> (B), P<sub>sigNDN</sub> (C)  
733 and P<sub>sigNUP\*</sub> mutated for the putative LexA binding site (D). Purified LexA protein was  
734 added to each reaction at the indicated concentration.

735

736 **Figure 5: SigN is a sigma factor that drives transcription *in vitro*.** *In vitro*  
737 transcription assays using  $P_{veg}$  (left),  $P_{sigN}^{UP}$  (middle), and  $P_{sigN}^{DN}$  (right) promoter  
738 fragments in the presence (+) and absence (-) of 5X molar ratio of SigN added to RNA  
739 polymerase holoenzyme purified from *B. subtilis*. The predicted transcriptional products  
740 resulting from  $P_{sigN1}$ ,  $P_{sigN2}$ , and  $P_{sigN4}$  are indicated. Two products were observed from  
741  $P_{veg}$  likely due to proper termination (short product) and terminator read-through (long  
742 product).

743

744 **Figure 6. Model of pBS32-mediated cell death.** MMC-mediated DNA damage  
745 causes LexA autoproteolysis and derepression of sigN expression. SigN is a sigma

746 factor that directs RNA polymerase to increase its own expression (creating positive  
747 feedback) and the expression of a regulon of genes on pBS32. Activation of genes  
748 within the SigN-regulon results in cell death. pBS32 represented as a circle. Arrows  
749 within the circle indicate reading frames. Reading frames and gene names that are  
750 expressed by SigN are indicated in red. The location of SigN-dependent promoters is  
751 indicated by red carets. T bars indicate inhibition and arrows indicate activation.





A

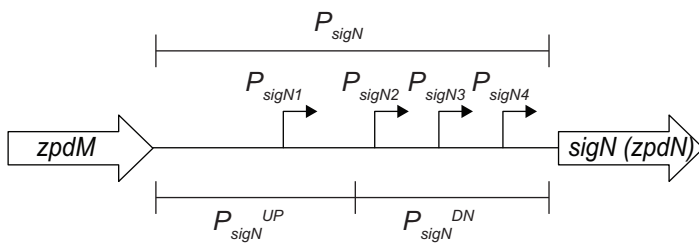

B

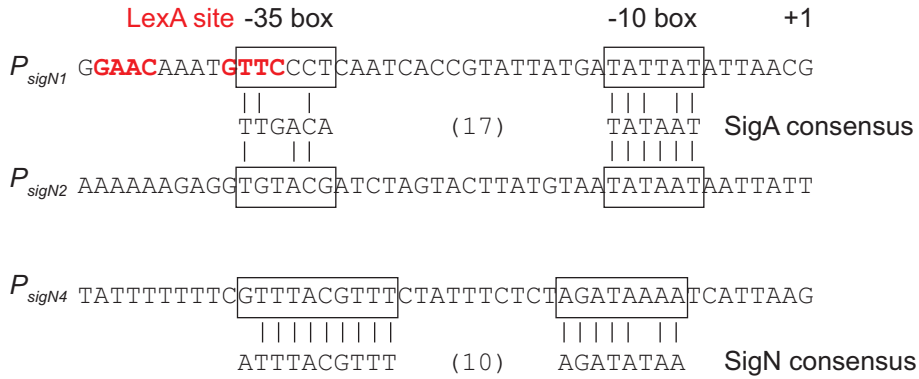

C

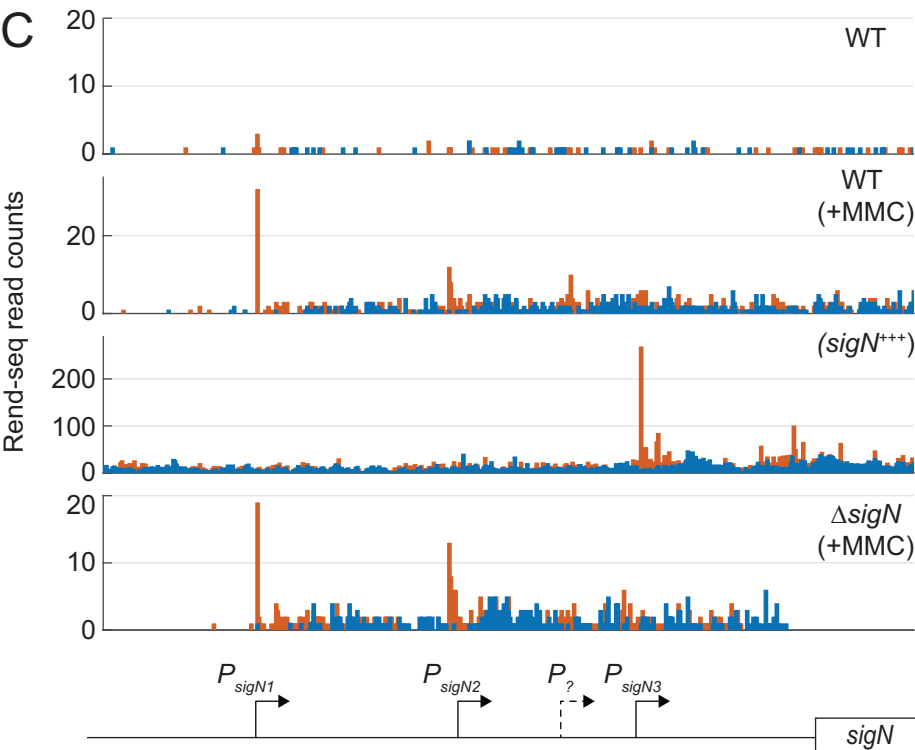

D

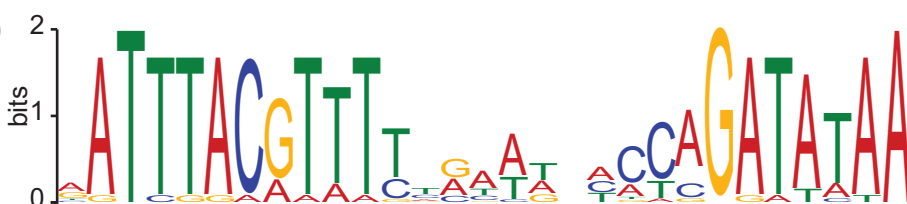

Figure 3

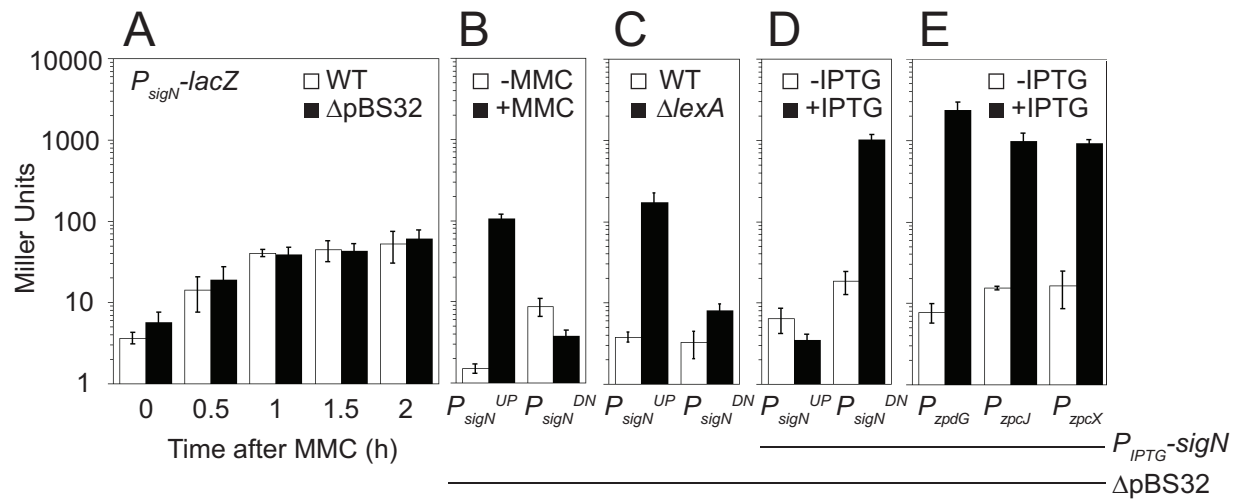

**A** 0 1 5 10 50 100 500 0 LexA [nM]

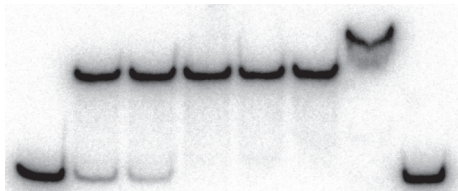

**B** 0 1 5 10 50 100 500 0 LexA [nM]

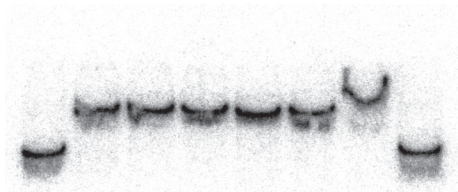

**C** 0 1 5 10 50 100 500 0 LexA [nM]

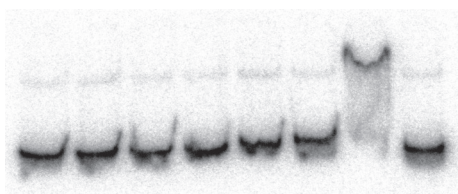

**D** 0 1 5 10 50 100 500 0 LexA [nM]

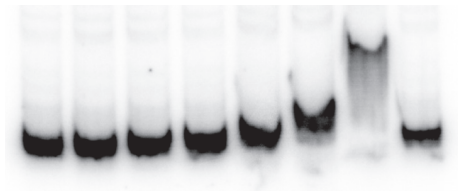

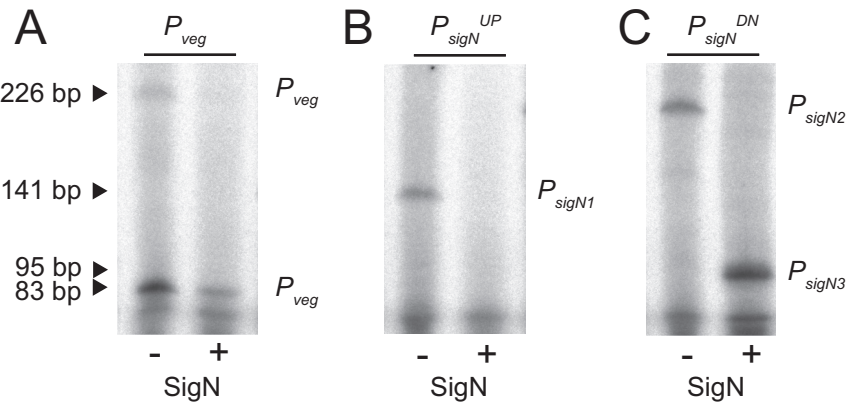

Figure 6

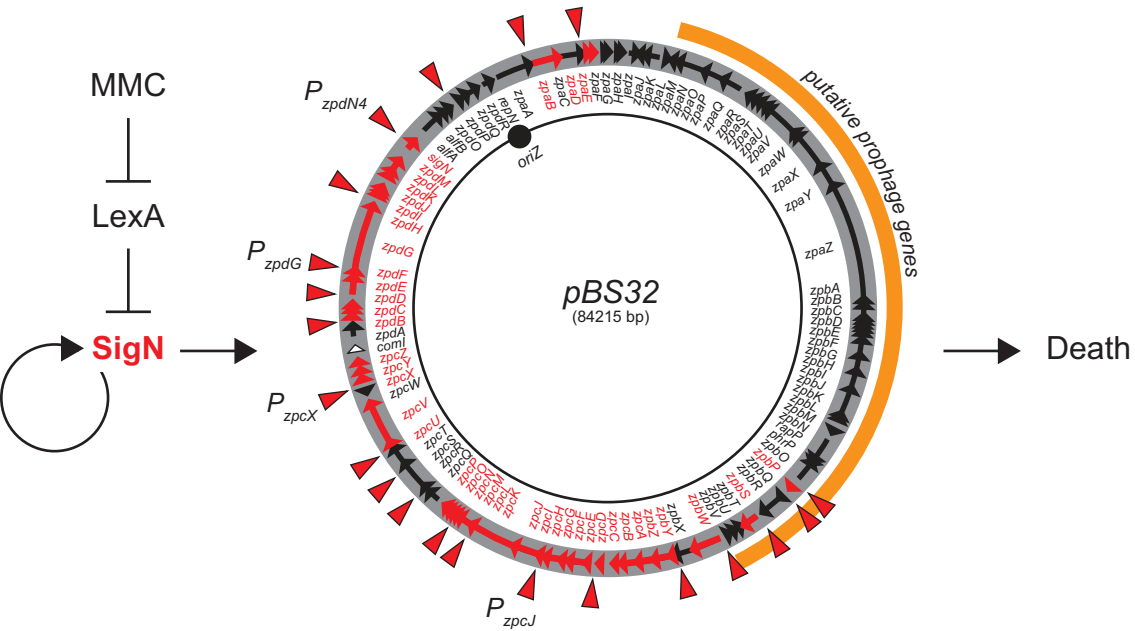

Source: https://www.biorxiv.org/content/10.1101/624585v1.full.pdf
